# Supplementary material
Source: PubMed Central journal article supplement (PMC4386634)
Supplement: NIHMS574437-supplement-Supplement.pdf [file NIHMS574437-supplement-Supplement.pdf]

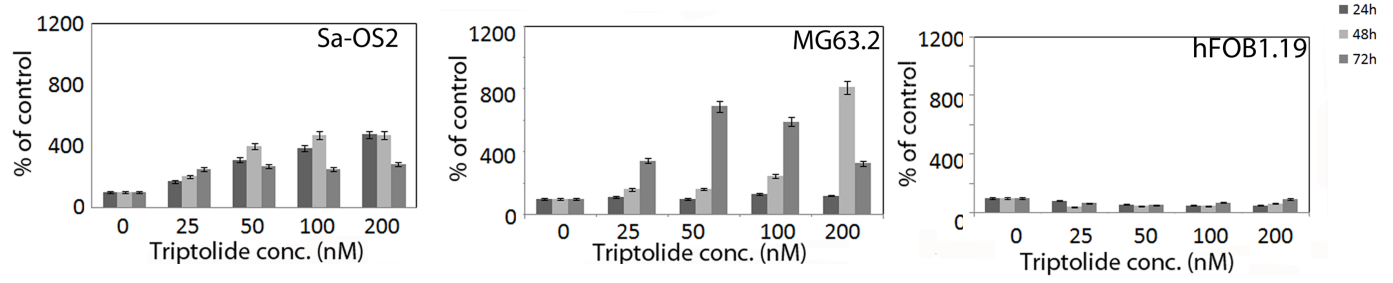

**Supplementary Figure 1. Caspase 9 activation in the osteosarcoma cell lines and osteoblasts.** Caspase-9 was induced in SaOS2 and MG63.2 cells in response to triptolide whereas human osteoblasts did not show any caspase activity.

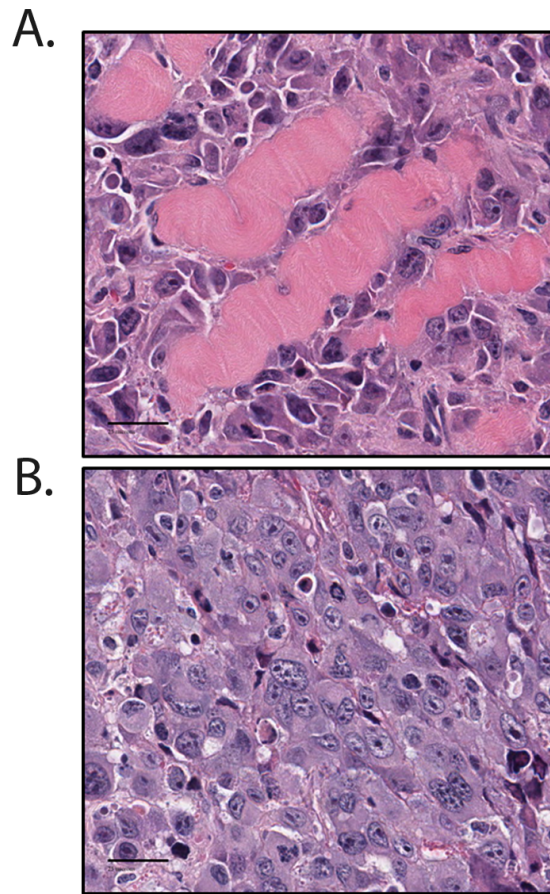

**Supplementary Figure 2. Histopathology of orthotopic OS tumors.** H & E staining of OS tumor showing aggressive nature of the orthotopic osteosarcoma. **A)** Aggressive osteosarcoma tumors cells invading and surrounding the skeletal muscle tissue. **B)** Tumor cells with aberrant nuclei with multiple nucleoli (40X magnification, scale=25  $\mu$ M).

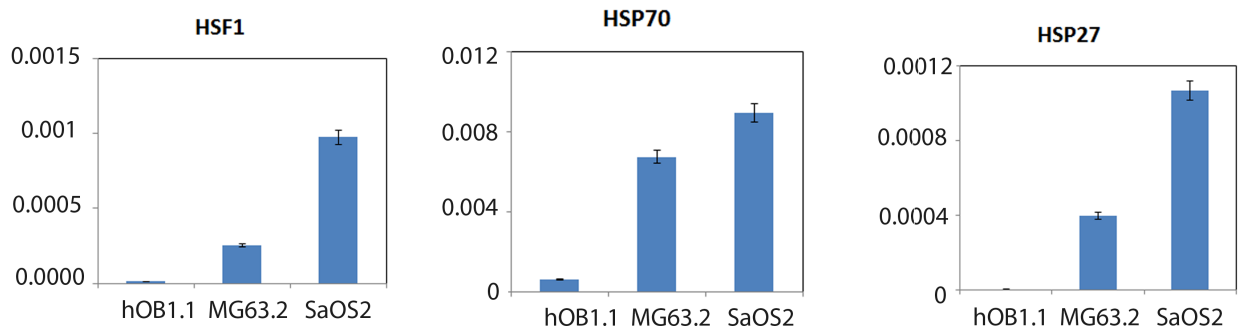

**Supplementary Figure 3. Expression of heat shock proteins.** HSP70, HSF1 and HSP27 mRNA expression in SaOS2, MG63.2 and osteoblast cells. These pro-survival proteins were overexpressed in cancer cells when compared to osteoblasts.

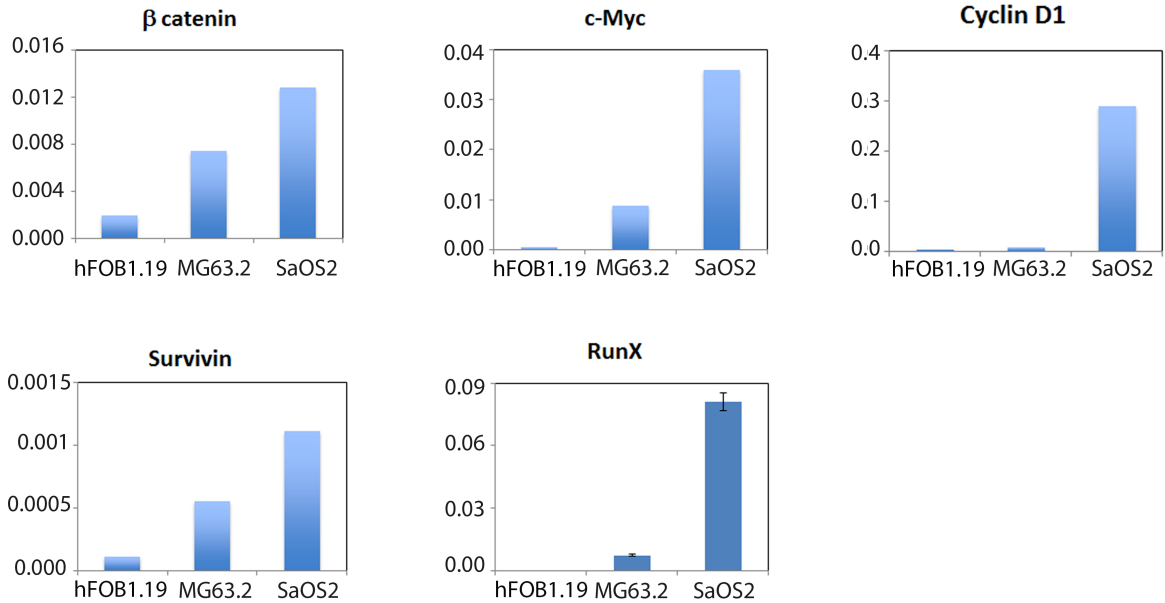

**Supplementary Figure 4. Expression of pro-proliferation genes.** Pro-proliferation and pro-survival genes like b-catenin, Survivin, c-MYC, RUNX2 and cyclin D1 were overexpressed in osteosarcoma cell lines compared to osteoblasts.

Supplementary Table 1: Genotypes of osteosarcoma cell lines used in this study.

|    | <b>Cell Line</b> | <b>Major mutation</b> | <b>Host</b>                   |
|----|------------------|-----------------------|-------------------------------|
| 1. | SaOS2            | p53 -/Rb-             | Human                         |
| 2. | HOS              | Rb+/p53-              | Human                         |
| 3. | U2OS             | P53+/Rb+              | Human                         |
| 4. | K7M2             | P53-/Rb-              | Mouse (parental strain SaOS2) |
| 5. | MG63.2           | Rb+/p53-              | Mouse (parental strain MG63)  |

Supplementary Table 2: Primers used in the study

| <b>Gene</b> | <b>Forward Primer</b> | <b>Reverse Primer</b>    |
|-------------|-----------------------|--------------------------|
| HSP70       | ACCAAGCAGACGCAGATC    | CGCCCTCGTACACCTGGA       |
| HSP27       | CCCGCATAGCCGCCTCTTC   | GCCTCCACGGTCAGTGTGCC     |
| b-catenin   | TTGATATTGGTGCCAGGGAGA | TGCAAGTTCAGACAATACAGCTAA |
| c-Myc       | CGTCCTCGGATTCTCTGCTC  | GCTGCGTAGTTGTGCTGATG     |
| Survivin    | AGATGACGACCCCATGCAAA  | CGCACTTTCTCCGCAGTTTC     |
| CyclinD     | CACACGGACTACAGGGGAGT  | GATGGTTTCCACTTCGCAGC     |
| RunX2       | CGCCTCACAAACAACCACAG  | TCACTGTGCTGAAGAGGCTG     |
